# Supplementary material for: Comparative analysis of combined phosphorus and drought stress-responses in two winter wheat
Source: PeerJ. 2022 Sep 22;10:e13887. doi: 10.7717/peerj.13887 (PMC9509674; doi:10.7717/peerj.13887)
Supplement: Supplemental Information 1 — A completed MIAME checklist for Gene expression data of winter wheat root under drought stress for 7 days by two phosphorus treatments. [file peerj-10-13887-s001.xlsx]

## Sheet: Metadata
SERIES
# This section describes the overall experiment.
title	Gene expression data of winter wheat root under drought stress for 7 days by two phosphorus treatments
summary	A complex regulatory network is the mechanism of wheat roots responding to drought stress at low and adequate phosphorus levels. The transcription levels of genes encoding silicon transporters, phosphate transporters, sucrose synthesis, etc., are mostly up-regulated in Xindong20. The genes encoding the electron transport chain and the respiratory chain are mostly down-regulated in Xindong23. Thes…
summary	The objective of the present data was to increase the information about the effect of drought on the transcriptomes of wheat root cultured by two phosphorus levels.
overall design	To study the transcriptional responses of two winter wheat (Xindong20 and Xindong23) roots under drought stress during two phosphorus (CP and LP) treatments. The total RNA of the root sampled from two phosphorus treatments at 7d under drought stress was extracted and carried out the following gene chip experiments. Additionally, three biological replicates were performed in this study to reduce t…
contributor	Xiangchi Zhang
contributor	Weidan Lu
contributor	Xiaoli Wang
contributor	Bin Ma
contributor	Kaiyong Fu
contributor	Cheng Li
contributor	Chunyan Li
SAMPLES
# The Sample names in the first column are arbitrary but they must match the column headers of the Matrix table (see next worksheet).
Sample name	title	CEL file	source name	organism	characteristics: tissue	characteristics: genotype	characteristics: age	molecule	label	description	chip name or GEO platform id
Xindong20_LP3_(wheat)	Xindong20 wheat root_LP_rep3	A1_(wheat).CEL	Xindong20 root under drought stress for 7 days by LP	Triticum aestivum L.	wheat seedlings root	Xindong20	under drought stress for 7 days by LP	total RNA	biotin	Gene expression data fromXindong20 root under drought stress for 7 days by LP	Wheat Genome Array
Xindong23_CP2_(wheat)	Xindong23 wheat root_CP_rep2	A2_(wheat).CEL	Xindong23 root under drought stress for 7 days by CP	Triticum aestivum L.	wheat seedlings root	Xindong23	under drought stress for 7 days by CP	total RNA	biotin	Gene expression data fromXindong23 root under drought stress for 7 days by CP	Wheat Genome Array
Xindong23_LP3_(wheat)	Xindong23 wheat root_LP_rep3	B1_(wheat).CEL	Xindong23 root under drought stress for 7 days by LP	Triticum aestivum L.	wheat seedlings root	Xindong23	under drought stress for 7 days by LP	total RNA	biotin	Gene expression data fromXindong23 root under drought stress for 7 days by LP	Wheat Genome Array
Xindong23_CP3_(wheat)	Xindong23 wheat root_CP_rep3	B2_(wheat).CEL	Xindong23 root under drought stress for 7 days by CP	Triticum aestivum L.	wheat seedlings root	Xindong23	under drought stress for 7 days by CP	total RNA	biotin	Gene expression data fromXindong23 root under drought stress for 7 days by CP	Wheat Genome Array
Xindong20_CP1_(wheat)	Xindong20 wheat root_CP_rep1	C1_(wheat).CEL	Xindong20 root under drought stress for 7 days by CP	Triticum aestivum L.	wheat seedlings root	Xindong20	under drought stress for 7 days by CP	total RNA	biotin	Gene expression data fromXindong20 root under drought stress for 7 days by CP	Wheat Genome Array
Xindong23_LP1_(wheat)	Xindong23 wheat root_LP_rep1	C2_(wheat).CEL	Xindong23 root under drought stress for 7 days by LP	Triticum aestivum L.	wheat seedlings root	Xindong23	under drought stress for 7 days by LP	total RNA	biotin	Gene expression data fromXindong23 root under drought stress for 7 days by LP	Wheat Genome Array
Xindong20_CP2_(wheat)	Xindong20 wheat root_CP_rep2	D1_(wheat).CEL	Xindong20 root under drought stress for 7 days by CP	Triticum aestivum L.	wheat seedlings root	Xindong20	under drought stress for 7 days by CP	total RNA	biotin	Gene expression data fromXindong20 root under drought stress for 7 days by CP	Wheat Genome Array
Xindong23_LP2_(wheat)	Xindong23 wheat root_LP_rep2	D2_(wheat).CEL	Xindong23 root under drought stress for 7 days by LP	Triticum aestivum L.	wheat seedlings root	Xindong23	under drought stress for 7 days by LP	total RNA	biotin	Gene expression data fromXindong23 root under drought stress for 7 days by LP	Wheat Genome Array
Xindong20_CP3_(wheat)	Xindong20 wheat root_CP_rep3	E1_(wheat).CEL	Xindong20 root under drought stress for 7 days by CP	Triticum aestivum L.	wheat seedlings root	Xindong20	under drought stress for 7 days by CP	total RNA	biotin	Gene expression data fromXindong20 root under drought stress for 7 days by CP	Wheat Genome Array
Xindong20_LP1_(wheat)	Xindong20 wheat root_LP_rep1	F1_(wheat).CEL	Xindong20 root under drought stress for 7 days by LP	Triticum aestivum L.	wheat seedlings root	Xindong20	under drought stress for 7 days by LP	total RNA	biotin	Gene expression data fromXindong20 root under drought stress for 7 days by LP	Wheat Genome Array
Xindong20_LP2_(wheat)	Xindong20 wheat root_LP_rep2	G1_(wheat).CEL	Xindong20 root under drought stress for 7 days by LP	Triticum aestivum L.	wheat seedlings root	Xindong20	under drought stress for 7 days by LP	total RNA	biotin	Gene expression data fromXindong20 root under drought stress for 7 days by LP	Wheat Genome Array
Xindong23_CP1_(wheat)	Xindong23 wheat root_CP_rep1	H1_(wheat).CEL	Xindong23 root under drought stress for 7 days by CP	Triticum aestivum L.	wheat seedlings root	Xindong23	under drought stress for 7 days by CP	total RNA	biotin	Gene expression data fromXindong23 root under drought stress for 7 days by CP	Wheat Genome Array
PROTOCOLS
# This section includes protocols and fields which are common to all Samples.
# Protocols which are applicable to specific Samples or specific channels should be included in additional columns of the SAMPLES section instead.
growth protocol	The wheat plants were grown in growth cabinets (JNYQ, RXZ-300B-LED, China) with an 18 h day-length at 25°C under photosynthetically active light (250 µmole m-2 s-1) and a night temperature of 20°C.
treatment protocol	The seedlings with each box contained the same capacity of Hoagland nutrient solution, which were divided into conventional phosphorus level (CP: 1.0 mmol /L) and low phosphorus level (LP: 0.05 mmol /L), respectively. KCl was used to replace part of KH2PO4 under low phosphorus condition. The nutrient solution was changed every 3 days. After 14d of culture, the Hoagland nutrient solution (both CP …
extract protocol	Trizol extraction of total RNA was performed according to the manufacturer's instructions.
label protocol	Biotinylated cRNA were prepared according to the standard Affymetrix protocol from 100ng total RNA.
hyb protocol	Following fragmentation, 10 ug of cRNA were hybridized for 16 hr at 45℃ on GeneChip Wheat Genome Array. GeneChips were washed and stained in the Affymetrix Fluidics Station 450.
scan protocol	GeneChips were scanned using the Affymetrix GeneChip® 3000 Scanner with 7G upgrade.
data processing	Command Console software (version4.0, Affymetrix) was used to analyze array images to get raw data and then Expression Console software (version 1.4.1, Affymetrix) offered RMA normalization. Then, a moderated t-test was performed to identify probe sets with differential expression between the different variants.
value definition	log2 GC-RMA signal intensity
